# Supplementary material
Source: PubMed Central journal article supplement (PMC5947459)
Supplement: supp_the2017-0479_onco12404-sup-0001-suppinfo01.pdf [file supp_the2017-0479_onco12404-sup-0001-suppinfo01.pdf]

Supplemental Figure for:  
Next-Generation Sequencing of Circulating Tumor DNA Reveals Frequent Alterations in Advanced Hepatocellular Carcinoma  
Sadakatsu Ikeda et al.

**Figure S1.** Genes covered by Guardant 360

Genes with Complete Exon and Partial Intron Coverage

| Gene                 | LOD   | Gene                            | LOD   | Gene                | LOD   | Gene                | LOD   |
|----------------------|-------|---------------------------------|-------|---------------------|-------|---------------------|-------|
| <i>APC</i>           | <0.1% | <b><i>AR</i></b>                | <0.1% | <i>ARID1A</i>       | <0.1% | <b><i>BRAF</i></b>  | <0.1% |
| <i>BRCA1</i>         | <0.1% | <i>BRCA2</i>                    | <0.1% | <i>CCND1</i>        | <0.1% | <i>CCND2</i>        | <0.1% |
| <b><i>CCNE1</i></b>  | <0.1% | <b><i>CDK4</i></b>              | <0.1% | <b><i>CDK6</i></b>  | <0.1% | <i>CDKN2A</i>       | <0.1% |
| <i>CDKN2B</i>        | <0.1% | <b><i>EGFR</i></b> <sup>#</sup> | <0.1% | <b><i>ERBB2</i></b> | <0.1% | <b><i>FGFR1</i></b> | <0.1% |
| <i>FGFR2</i>         | <0.1% | <i>HRAS</i>                     | <0.1% | <b><i>KIT</i></b>   | <0.1% | <b><i>KRAS</i></b>  | <0.1% |
| <b><i>MET</i></b>    | <0.1% | <i>MYC</i>                      | <0.1% | <i>NF1</i>          | <0.1% | <i>NRAS</i>         | <0.1% |
| <b><i>PDGFRA</i></b> | <0.1% | <i>PIK3CA</i>                   | <0.1% | <i>PTEN</i>         | <0.1% | <b><i>RAF1</i></b>  | <0.1% |
| <i>TP53</i>          | <0.1% |                                 |       |                     |       |                     |       |

Genes in bold are those that are also analyzed for copy number variations (CNVs).

<sup>#</sup> EGFR indels in exon 19 and 20.

Genes with Critical Exon Coverage

| Gene          | LOD   | Gene          | LOD   | Gene         | LOD   | Gene          | LOD   |
|---------------|-------|---------------|-------|--------------|-------|---------------|-------|
| <i>AKT1</i>   | <0.1% | <i>ALK</i>    | <0.1% | <i>ARAF</i>  | <0.1% | <i>ATM</i>    | <0.1% |
| <i>CDH1</i>   | <0.1% | <i>CTNNB1</i> | <0.1% | <i>ESR1</i>  | <0.1% | <i>EZH2</i>   | <0.1% |
| <i>FBXW7</i>  | <0.1% | <i>FGFR3</i>  | <0.1% | <i>GATA3</i> | <0.1% | <i>GNA11</i>  | <0.1% |
| <i>GNAQ</i>   | <0.1% | <i>GNAS</i>   | <0.1% | <i>HNF1A</i> | <0.1% | <i>IDH1</i>   | <0.1% |
| <i>IDH2</i>   | <0.1% | <i>JAK2</i>   | 0.1%  | <i>JAK3</i>  | <0.1% | <i>MAP2K1</i> | <0.1% |
| <i>MAP2K2</i> | <0.1% | <i>MLH1</i>   | <0.1% | <i>MPL</i>   | <0.1% | <i>NFE2L2</i> | <0.1% |
| <i>NOTCH1</i> | <0.1% | <i>NPM1</i>   | 0.2%  | <i>NTRK1</i> | <0.1% | <i>PTPN11</i> | <0.1% |
| <i>RET</i>    | <0.1% | <i>RHEB</i>   | 0.1%  | <i>RHOA</i>  | <0.1% | <i>RIT1</i>   | <0.1% |
| <i>ROS1</i>   | 0.1%  | <i>SMAD4</i>  | <0.1% | <i>SMO</i>   | <0.1% | <i>SRC</i>    | <0.1% |
| <i>STK11</i>  | <0.1% | <i>TERT</i>   | <0.1% | <i>VHL</i>   | <0.1% |               |       |

Rearrangements

| Gene       | LOD   | Gene         | LOD   | Gene       | LOD   | Gene        | LOD   |
|------------|-------|--------------|-------|------------|-------|-------------|-------|
| <i>ALK</i> | <0.1% | <i>NTRK1</i> | <0.1% | <i>RET</i> | <0.1% | <i>ROS1</i> | <0.1% |
